# Supplementary material for: Wall-number selective growth of vertically aligned carbon nanotubes from FePt catalysts: a comparative study with Fe catalysts
Source: Royal Society of Chemistry journal article supplement (doi:10.1039/c2jm32270f), 2012-01-01
Supplement: c2jm32270f.pdf [file c2jm32270f.pdf]

## Supporting Information for

# Wall-Number Selective Growth of Vertically Aligned Carbon Nanotubes from FePt Catalyst: A Comparative Study with Fe Catalyst

Shisheng Li, Pengxiang Hou, Chang Liu\*, Libo Gao, Bilu Liu, Lili Zhang, Man Song, Hui-Ming Cheng

<sup>†</sup>*Shenyang National Laboratory for Materials Science, Institute of Metal Research, Chinese Academy of Sciences, 72 Wenhua Road, Shenyang 110016, P. R. China*

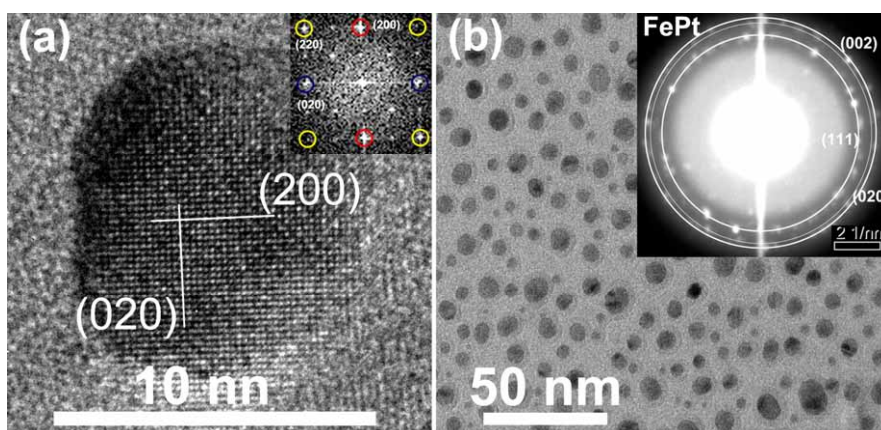

**Fig. S1** (a) Typical high resolution TEM image of a FePt NP; (b) Low magnification TEM image of the FePt NPs. Inset shows a selected area electron diffraction pattern of the FePt NPs.

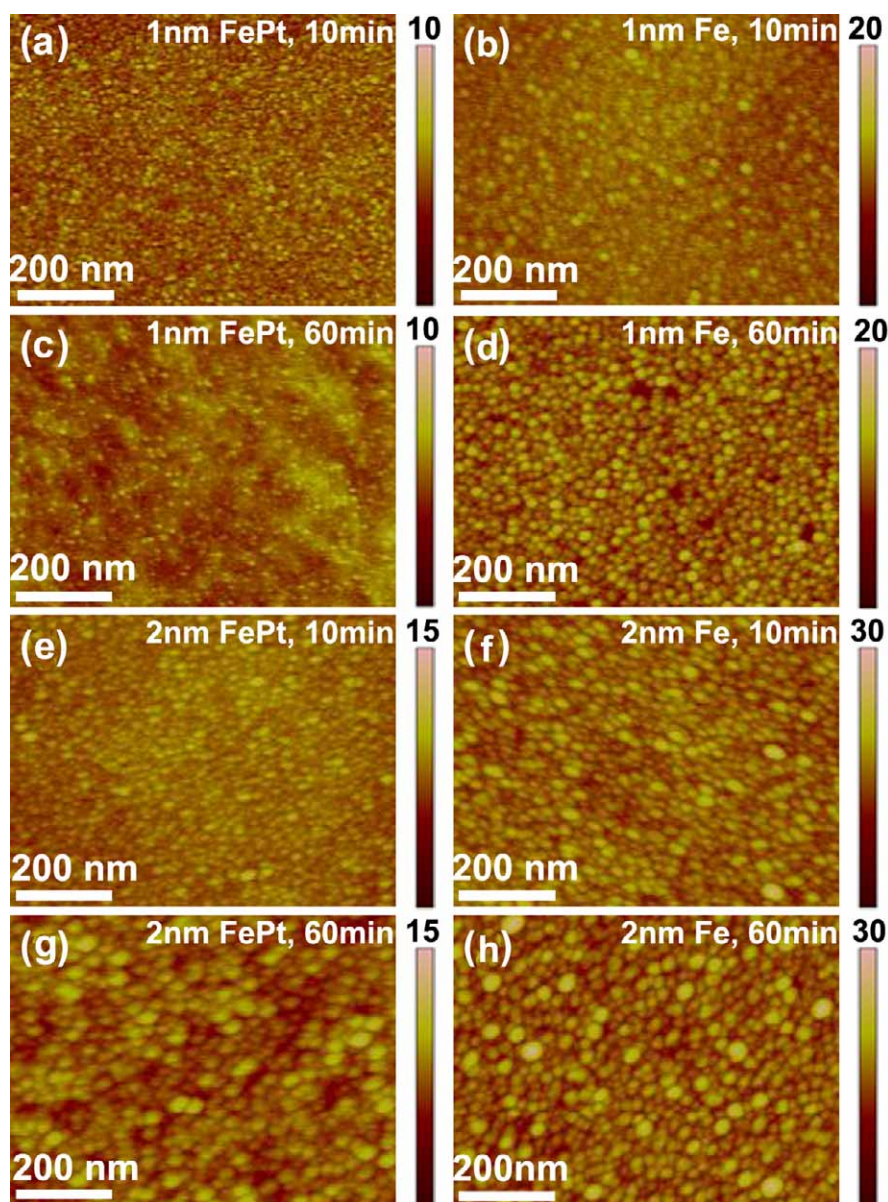

**Fig. S2** AFM images showing the thermal aggregation behavior of FePt and Fe films at 775 °C under Ar/H<sub>2</sub> atmosphere. (a) 1 nm FePt, 10 min annealing; (b) 1 nm Fe, 10 min annealing; (c) 1 nm FePt, 60 min annealing; (d) 1 nm Fe, 60 min annealing; (e) 2 nm FePt, 10 min annealing; (f) 2 nm Fe, 10 min annealing; (g) 2 nm FePt, 60 min annealing; (h) 2 nm Fe, 60 min annealing.

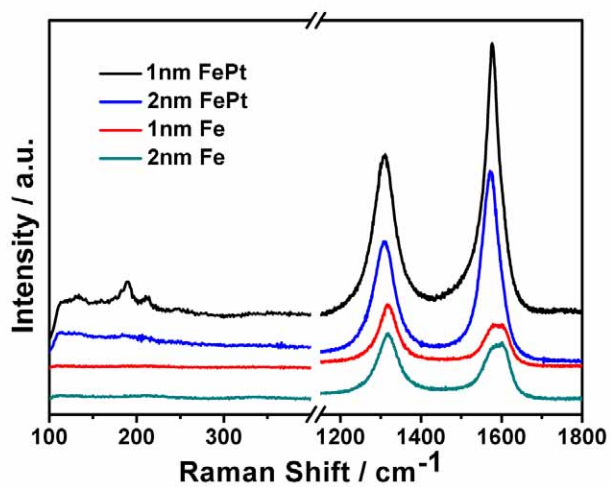

**Fig. S3** Laser Raman spectra of the VA-CNTs grown from the FePt and Fe catalyst (as shown in Figure 3) using an excitation wavelength of 632.8 nm.

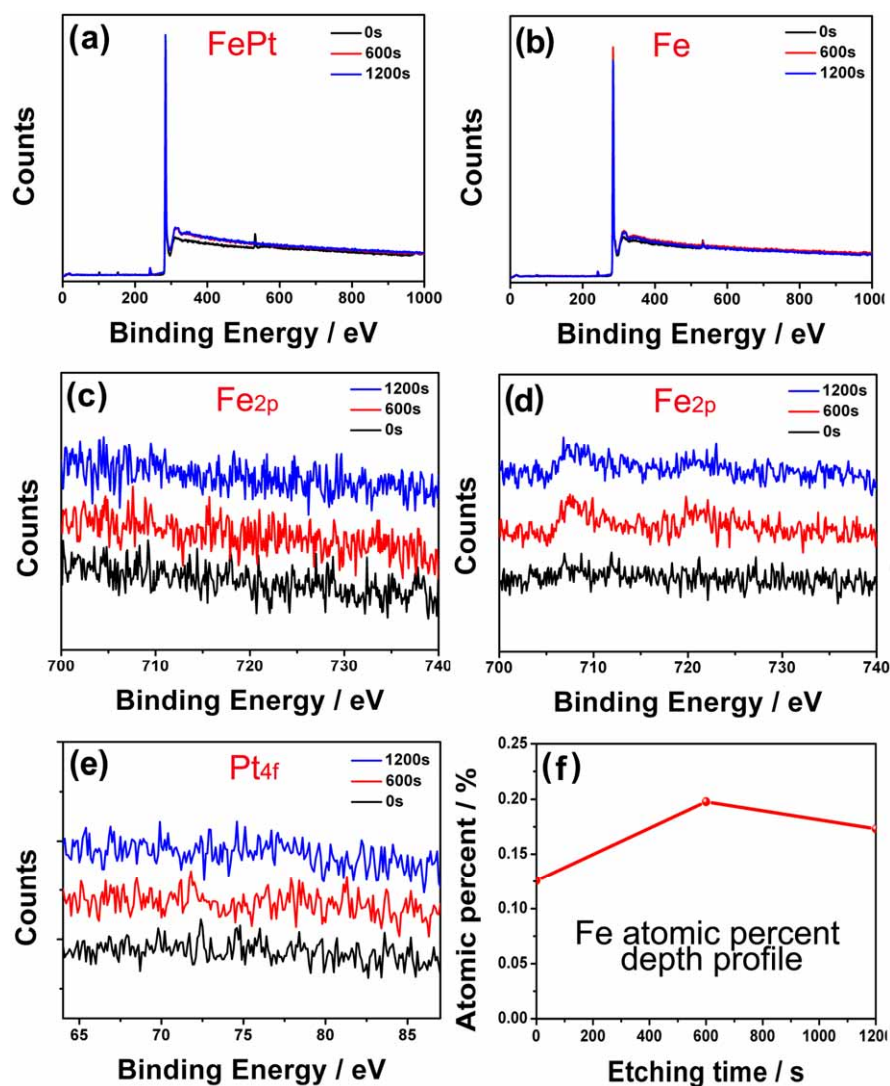

**Fig. S4** Survey XPS spectra of the VA-CNTs grown from (a) 2 nm-thick FePt catalyst film; (b) 2 nm-thick Fe catalyst film. High resolution Fe<sub>2p</sub> and Pt<sub>4f</sub> spectra for the VA-CNTs grown from (c, e) the 2 nm-thick FePt catalyst film and (d) the 2 nm-thick Fe catalyst film. (f) Atomic percent depth profile of Fe residue in the VA-CNTs grown from the 2 nm-thick Fe catalyst film. No Fe and Pt residues can be detected in the VA-CNTs grown from the 2 nm-thick FePt catalyst film.

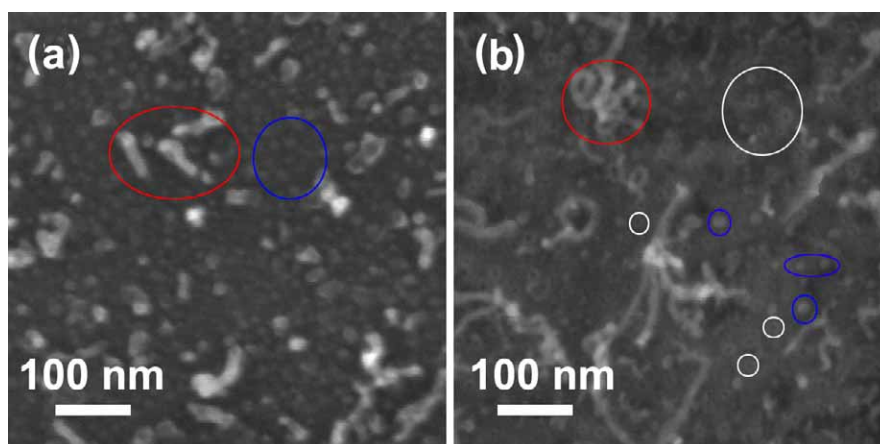

**Fig. S5** SEM images of the substrate surface after the grown VA-CNTs were removed. (a) Substrate with the 2 nm FePt as catalyst; (b) Substrate with the 2 nm Fe as catalyst. Red circles labeled in the images show the residual broken CNTs; in blue circles are the anchored catalyst NPs; the white circles show holes left by pulling off the catalyst NPs.

**Table S1.** The size distribution, mean size and area density of the FePt and Fe catalyst NPs

|      | Catalyst film thickness | NP Size distribution                                       | NP Mean size                                             | NP area density                           |
|------|-------------------------|------------------------------------------------------------|----------------------------------------------------------|-------------------------------------------|
| FePt | 1 nm                    | 1-5 nm                                                     | 2.7 nm                                                   | $\sim 2.1 \times 10^{12} \text{ cm}^{-2}$ |
| Fe   | 1 nm                    | 6-20 nm for Fe-FeO <sub>x</sub> NPs<br>5-17 nm for Fe NP   | 13.6 nm for Fe-FeO <sub>x</sub> NPs<br>11.4 nm for Fe NP | $\sim 1.0 \times 10^{11} \text{ cm}^{-2}$ |
| FePt | 2 nm                    | 1-13 nm                                                    | 8.1 nm                                                   | $\sim 3.0 \times 10^{11} \text{ cm}^{-2}$ |
| Fe   | 2 nm                    | 13-29 nm for Fe-FeO <sub>x</sub> NPs<br>11-25 nm for Fe NP | 20.8 nm for Fe-FeO <sub>x</sub> NPs<br>17.4 nm for Fe NP | $\sim 5.8 \times 10^{10} \text{ cm}^{-2}$ |
